# Supplementary material
Source: publisher figshare collection journal article supplement (https://tandf.figshare.com/ndownloader/files/22567457)
Supplement: Supplementary file 1 [file 22567457]

**Supporting information**

Fabrication of recyclable magnetic biosorbent from eggshell membrane for ultrahigh adsorption of dye *Junfeng Zhao**a*, Xuemin Wena, Huashan Xu a,*

*Yuancui Weng a, Yanqiu Chen a*

*a*School of Chemistry and Materials Engineering, Changshu Institute of Technology,

Changshu, P. R. China.

***Corresponding author Tel.: +86-512-52251842; fax. : +86-512-52251842.

E-mail address: jfzhao@cslg.edu.cn





**Figure S1** TG/DSC traces of the different samples heated in flowing oxygen





**Figure S2** Room temperature hysteresis loops of MESM-P, the inset shows a magnified view of the hysteresis loops of MESM-24h.





**Figure S3** Effects of Mass of Fe3O4 loading in ESM on the adsorption capacity of CR

**
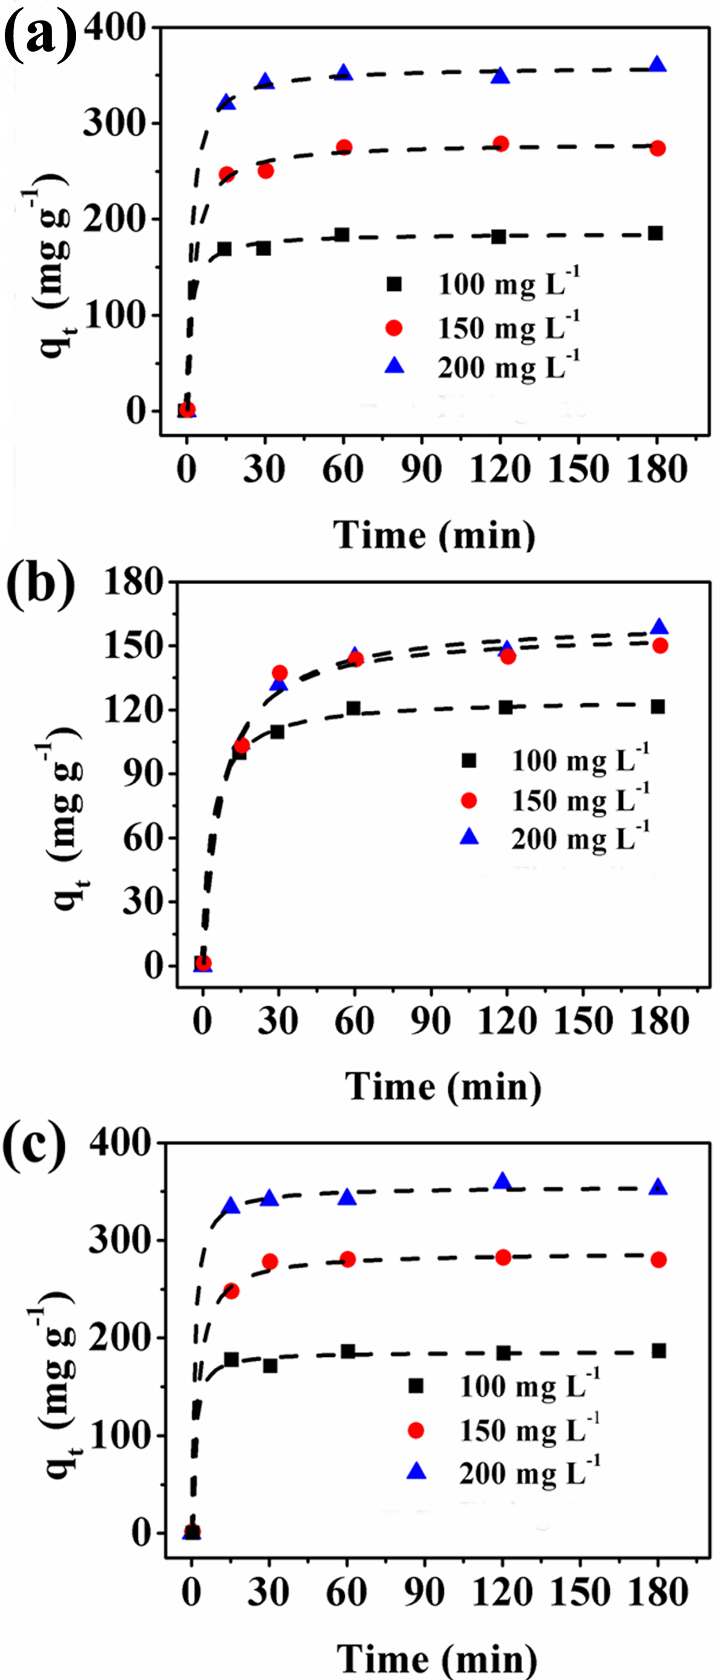
**

**Figure S4.** The effect of contact time on the adsorption capacity for (a) MESM-P, (b) Fe3O4, and (c) ESM-P.

**
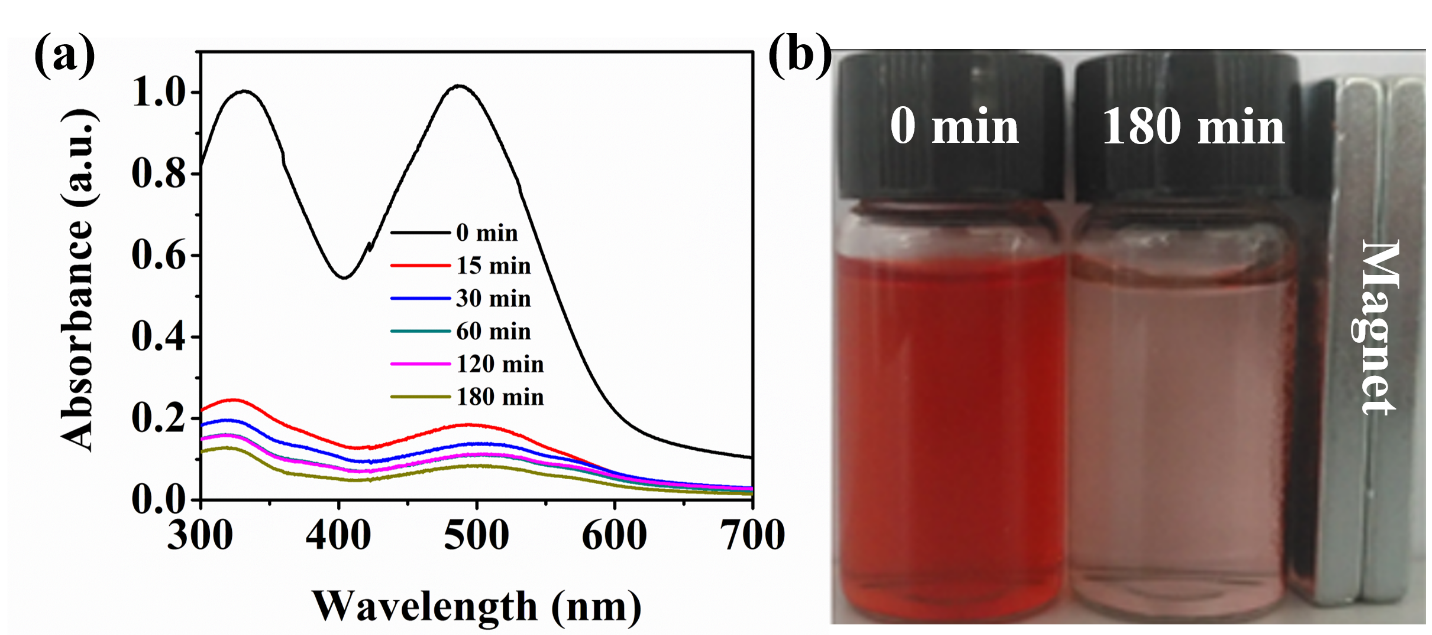
**

**Figure S5. (a)** UV-vis adsorption spectra of CR (200 mg L-1) treated by MESM-P at various time intervals, (b) photographs of CR solutions before and after adsorption, and magnetic separation by external magnetic field.


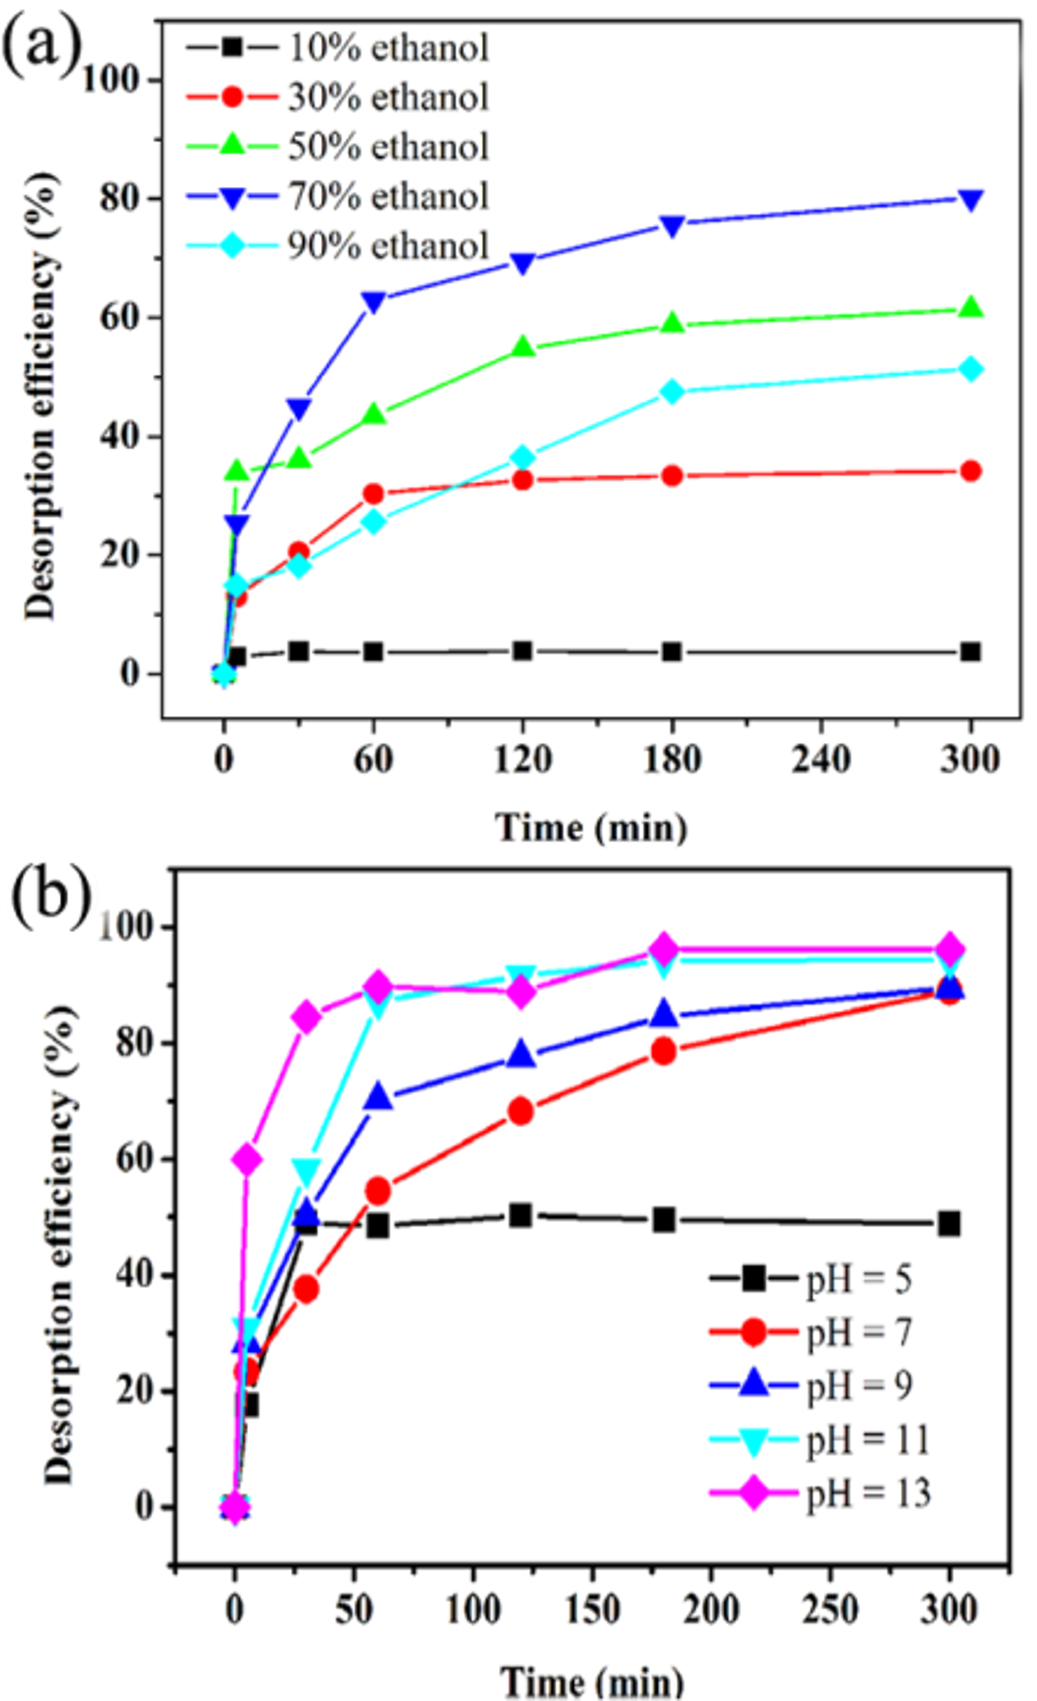


**Figure S6** (a) Effect of the contact time on CR desorption from MESM-P in the various ethanol-water solvent, (b) Effect of the contact time on CR desorption from MESM-P at different pH values.
